# Supplementary material for: Climate change performance of hydrogen production based on life cycle assessment
Source: Royal Society of Chemistry journal article supplement (doi:10.1039/d3gc02410e), 2024-01-01
Supplement: d3gc02410e1.xlsx [file d3gc02410e1.xlsx]

## Sheet: References
	References
	Havukainen, J., Saud, A., Astrup, T.F., Peltola, P., Horttanainen, M., 2022. Environmental performance of dewatered sewage sludge digestate utilization based on life cycle assessment. Waste Manag. 137, 210–221. https://doi.org/10.1016/j.wasman.2021.11.005
	Hermesmann, M., & Müller, T. E. (2022). Green, Turquoise, Blue, or Grey? Environmentally friendly Hydrogen Production in Transforming Energy Systems. In Progress in Energy and Combustion Science (Vol. 90). Elsevier Ltd. https://doi.org/10.1016/j.pecs.2022.100996
	Petrescu, L., Müller, C. R., & Cormos, C. C. (2014). Life cycle assessment of natural gas-based chemical looping for hydrogen production. Energy Procedia, 63, 7408–7420. https://doi.org/10.1016/j.egypro.2014.11.777
	Amaya-Santos, G., Chari, S., Sebastiani, A., Grimaldi, F., Lettieri, P., & Materazzi, M. (2021). Biohydrogen: A life cycle assessment and comparison with alternative low-carbon production routes in UK. Journal of Cleaner Production, 319. https://doi.org/10.1016/j.jclepro.2021.128886
	Collodi, G., Azzaro, G., Ferrari, N., & Santos, S. (2017). Techno-economic Evaluation of Deploying CCS in SMR Based Merchant H2 Production with NG as Feedstock and Fuel. Energy Procedia, 114, 2690–2712. https://doi.org/10.1016/j.egypro.2017.03.1533
	Keipi, T. (2017). Technology Development and Techno-Economic Analysis of Hydrogen Production by Thermal Decomposition of Methane. https://trepo.tuni.fi/handle/10024/114321
	Saygin, D., Tör, O. B., Cebeci, M. E., Teimourzadeh, S., & Godron, P. (2021). Increasing Turkey’s power system flexibility for grid integration of 50% renewable energy share. Energy Strategy Reviews, 34, 100625. https://doi.org/10.1016/J.ESR.2021.100625
	Mallapragada, D. S., Reyes-Bastida, E., Roberto, F., McElroy, E. M., Veskovic, D., & Laurenzi, I. J. (2018). Life cycle greenhouse gas emissions and freshwater consumption of liquefied Marcellus shale gas used for international power generation. Journal of Cleaner Production, 205, 672–680. https://doi.org/10.1016/J.JCLEPRO.2018.09.111
	Finn, A.J., Johnson, G.L. and Tomlinson, T.R., 1999. Developments in natural gas liquefaction. Hydrocarbon processing, 78(4), pp.47-59.
	Hwang, S., Jeong, B., Jung, K., Kim, M., & Zhou, P. (2019). Life Cycle Assessment of LNG Fueled Vessel in Domestic Services. Journal of Marine Science and Engineering 2019, Vol. 7, Page 359, 7(10), 359. https://doi.org/10.3390/JMSE7100359
	Franco, A., & Casarosa, C. (n.d.). Thermodynamic and heat transfer analysis of LNG energy recovery for power production. Journal of Physics: Conference Series OPEN ACCESS. https://doi.org/10.1088/1742-6596/547/1/012012
	Deng, H., Roussanaly, S., & Skaugen, G. (2019). Techno-economic analyses of CO2 liquefaction: Impact of product pressure and impurities. International Journal of Refrigeration, 103, 301–315. https://doi.org/10.1016/J.IJREFRIG.2019.04.011
	Jackson, S., & Brodal, E. (2019). Optimization of the CO2 Liquefaction Process-Performance Study with Varying Ambient Temperature. Applied Sciences 2019, Vol. 9, Page 4467, 9(20), 4467. https://doi.org/10.3390/APP9204467
	Crijns-Graus, W. H. J. (n.d.). Global Carbon Dioxide Storage Potential and Costs. Retrieved February 20, 2023, from https://www.researchgate.net/publication/260095614
	De Wild-Scholten, M. J. (2013). Energy payback time and carbon footprint of commercial photovoltaic systems. Solar Energy Materials and Solar Cells, 119, 296–305. https://doi.org/10.1016/J.SOLMAT.2013.08.037
	Kamal, M., Rabaia, H., Abdelkareem, M. A., Sayed, E. T., Elsaid, K., Chae, K.-J., Wilberforce, T., & Olabi, A. G. (2020). Environmental impacts of solar energy systems: A review. https://doi.org/10.1016/j.scitotenv.2020.141989
	Prakash, R., & Krishnan Bhat, I. (n.d.). Energy, economics and environmental impacts of renewable energy systems. https://doi.org/10.1016/j.rser.2009.05.007
	Natural Gas Density Calculator | Unitrove. (n.d.). Retrieved April 24, 2023, from https://www.unitrove.com/engineering/tools/gas/natural-gas-density
	Miljanovic, A., & Jonsson, F. (2022). Utilization of waste heat from hydrogen production : A case study on the Botnia Link H2 Project in Luleå, Sweden. https://urn.kb.se/resolve?urn=urn:nbn:se:mdh:diva-59079
	https://www.chemanalyst.com/Pricing-data/carbon-black-42
	https://www-statista-com.ezproxy.cc.lut.fi/statistics/1350339/global-carbon-black-market-size/
	https://www.kaasuyhdistys.fi/julkaisut/maakaasun-kasikirja/
	https://www-statista-com.ezproxy.cc.lut.fi/statistics/265344/total-global-natural-gas-production-since-1998/
	https://www.irena.org/Energy-Transition/Technology/Hydrogen

## Sheet: SMR
	Table SM 1. LCI for SMR.
	Parameter	Value	Unit
	Natural gas input	3.28161	kg/khH2
	Water use	6.64	kg b)
	Electricity input	1.01	MJ a)
	Hydrogen output	1	kg
	Carbon dioxide	8.67117	kg
	Electricity output	3.26594	MJ
	a) Electricity input is included in GABI process for SMR
	b) Water use is included in GABI process for SMR
	Life cycle inventory data collection for SMR
	Hermesmann & Müller (2022)
	Flows	quantiity	units	conversion
	Input
	Natural gas Input	4.85	m3	3.47745	kg/khH2		density of natural gas = 0.717 kg/m3				(Natural Gas Density Calculator)
	electricity input	N.D
	Process water	6.64	Kg
	Output
	Hydrogen output	1	kg
	electricity output	1.1	KWh	3.96	MJ
	Carbondioxide emission	9	kg
	Nitrogen	16.41	kg
	N.D = not defined
	Petrescu et al. (2014)
	Flows	quantiity	units	conversion
	Input
	Natural gas Input	31371.6	kg/h	3.45087	kg/khH2
	electricity input	N.D
	Process water	N.D
	Output
	Hydrogen output	300	MWth	300000	KWth	9090.91	KgH2/300MWth
	electricity output	10.76	MWe	1.23475	MJ
	Carbondioxide emission	267.39	kg/MWh	8.10273
	Nitrogen	N.D
	N.D = not defined
	Collodi at el.(2017)
	Flows	quantiity	units	conversion
	Input
	Natural gas Input	26.231	t/h	26231	kg/h	2.9165	kg/khH2
	electricity input	N.D
	Process water	N.D
	Output
	Hydrogen output	8.994	t/h	8994	kg/h	1	kg
	electricity output	11.5	MWe			4.60307	MJ
	Carbondioxide emission	0.8091	kg/Nm3 H2			8.91079	kg
	Nitrogen	N.D
	N.D = not defined

## Sheet: SMR-CCS
	Table SM 2. LCI of SMR-CCS.
	Parameter	Value	Unit
	Natural gas input	3.31169	kg
	Electricity input	1.01	MJ a)
	Hydrogen output	1	kg
	carbondioxide	4.19106	kg
	electricity output	2.05924	MJ
	a) Electricity input is included in GABI process for SMR
	Life cycle inventory data collection for SMR- CCS
	Hermesmann & Müller (2022)
	Carbon capture rate	(CCS- 56%)					(CCS 90%)
	Flows	quantiity	units	conversion			quantiity	units	conversion
	Input
	Natural gas Input	5.01	m3	3.59217	kg		5.33	m3	3.82161	kg	density of natural gas = 0.717 kg/m^3				(Natural Gas Density Calculator)
	electricity input	N.D					N.D
	Process water	6.8	Kg				4.68	kg
	Output
	Hydrogen output	1	kg				1	kg
	electricity output	0.17	KWh	0.612	MJ		0.05	KWh	0.18	MJ
	Carbondioxide emission	4.12	kg				0.99	kg
	Nitrogen	17.91	kg				20.84	kg
	N.D = not defined
	Amaya-Santos et al. (2021)
	Carbon capture rate	(CCS 90%)				Conversion
	Flows	quantiity	units
	Input
	Natural gas Input	80.56	kg			2.68533	kg
	electricity input	217.13	MJ			1.01	MJ
	Process water	N.D
	Output
	Hydrogen output	3600	MJ	30	kg	1kg	(hydrogen energy density = 120 MJ/kg )
	electricity output	N.D
	Carbondioxide emission		kg
	Nitrogen	N.D
	N.D = not defined
	Collodi at el.(2017)
	Carbon capture rate	(CCS 54.1%)		conversion			(CCS 90%) from flue gas and PSA		conversion
	Flows	quantiity	units				quantiity	units
	Input
	Natural gas Input	26.231	t/h	26231	2.9165	kg	26.231	t/h	26231	kg/h	2.9165	kg
	electricity input	N.D
	Process water	N.D
	Output
	Hydrogen output	8.994	t/h	8994	1	kg	8.994	t/h	8994	kg/h	1	kg
	electricity output	6.9	MWe		2.76184	MJ	11.7	MWe			4.68312	MJ
	Carbondioxide emission	0.387	kg/Nm3 H2		4.26211	kg	0.0888	kg/Nm3 H2			0.977974	kg
	Nitrogen	N.D	kg				-	kg
	N.D = not defined

## Sheet: PEM electrolyser
	Table SM 3. LCI of hydrogen production py PEM electrolyzer.
	Parameter	Value	Unit
	Electricity input	180.518	MJ
	Hydrogen output	1	kg
	Water	9.66667
	Oxygen output	8	kg
	Heat output	8	KWh (a)
	a) Heat output is included in the sensitivity analysis.
	Life cycle inventory data collection for PEM electrolyzer
	Hermesmann & Müller (2022)
	Flows	quantiity	units	conversion
	Input
	electricity input	55	KWh	198	MJ
	Deionised water	12	Kg
	Output
	Hydrogen output	1	kg
	oxygen	8	kg
	Amaya-Santos et al. (2021)
	Flows	quantiity	units			Conversion
	Input
	electricity input	4974	MJ			163.037	MJ
	Deionised water	226.8	kg			8
	Output
	Hydrogen output	3600	MJ	30.5085	kg	1	kg
	Carbondioxide emission	N.D
	oxygen	N.D
	N.D = not defined
	Miljanovic, A., & Jonsson, F. (2022)
	Flows	quantiity	units
	Input
	electricity input	234	MJ
	Deionised water	9	kg
	Output
	Hydrogen output	1	MJ
	Thermal energy	8	KWh
	Carbondioxide emission	N.D
	oxygen	8	Kg
	N.D = not defined

## Sheet: TDM
	Table SM 4. LCI of TDM.
	Parameter	Value	Unit
	Natural gas input	4.8039	kg
	Electricity input	4.608	MJ
	Hydrogen output	1	kg
	carbondioxide	1.865	kg
	Solid carbon output	3.25	kg
	Life cycle inventory data collection for TDM
	Hermesmann & Müller (2022)
	Flows	quantiity	units	Conversion
	Input
	Natural gas Input	6.7	m^3	4.8039	Kg
	electricity input	1.28	KWh	4.608	MJ
	Process water	-	Kg
	Output
	Hydrogen output	1	kg
	electricity output	N.D	KWh
	Carbondioxide emission	1.73	kg
	Carbon solid	3	kg
	N.D = not defined
	Keipi, T. (2017)
	Flows	quantiity	units	Conversion
	Input
	Natural gas Input	0.12	kg/s	6	kg
	electricity input	N.D
	Process water	0.3	kg/s	15	kg
	Output
	Hydrogen output	0.02	kg/s	1	kg
	electricity output	N.D
	Carbondioxide emission	0.04	kg/s	2	kg
	Carbon solid	0.07	kg/s	3.5	kg
	N.D = not defined

## Sheet: Other inventory
	Natural gas and energy data used for GABI modelling
	Table SM 5. LCI data collection of liquefication of CO2
	Parameters	Values	units	Reference
	Natural gas tranmission fugitive emission	0.05	%	(Lechtenböhmer and Dienst, 2010)
	Natural gas compression station	0.05	%	(Lechtenböhmer and Dienst, 2010)
	Calorfic value of natural gas (MJ/kg)	50	(MJ/kg)	(“Heat values of various fuels - World Nuclear Association,”)
	Natural gas Carbon dioxide emission	2.75	(CO2 / kg)	(“Combustion of Fuels - Carbon Dioxide Emission,”.)
	Energy required for regasification	0.23	(kWh / kg )	(Speirs et al., 2022)
	Energy required for CCS (kWh / kg CO2) (David and Herzog, n.d.)	0.35	(kWh / kg CO2)
	Energy required for compression of carbon captured ( kWh / kg of CO2)	0.1	(kWh / kg CO2)	(Jackson and Brodal,2019)
	Boil off rate	0.1	%	https://www.energy.gov/sites/prod/files/2019/09/f66/2019%20NETL%20LCA-GHG%20Report.pdf
	Average Enegry required for liquefication of NG	1.2	KWh/kg
	Liquefication of CO2	0.6577	KWh/kg	Deng at el 2019, Jackson, S., & Brodal, E. (2019)
	Injection of CO2	0.024	KWh/kg	Hendriks et al., 2004
	Life cyle inventory data for energy for liquefication of natural gas
	Parameters	Value	unit	coversion value	unit	reference
	energy requirement for liquefication of NG	3.0175	MJ/Kg NG	0.8381	KWh/kg	Mallapragada at el 2018
	energy requirement for liquefication of NG	1188	KJ/KG	0.33	KWh/kg	Finn et al., 1999
	energy requirement for liquefication of NG	0.23	Kg of NG loss	3.19	KWh/kg	Hwang et al 2019
	energy requirement for liquefication of NG	2900	KJ/KG	0.805	KWh/kg	Franco et al., 2014

## Sheet: Background data
	Table SM 6. Background data information.
	External process	Data source	Process
	Truck	Gabi database 10.5.1.124	Truck, Euro 3, 28 - 32t gross weight / 22t payload capacity
	Diesel	Gabi database 10.5.1.124	Heavy fuel oil at refinery (1.0wt.% S)
	Diesel	Gabi database 10.5.1.124	Heavy fuel oil at refinery (0.3wt.% S)
	USA natural gas grid	Gabi database 10.5.1.124	Natural gas mix (US)
	LNG cargo	Gabi database 10.5.1.124	LNG tanker, 125,000 m3 payload capacity, ocean going
	US electricity grid	Gabi database 10.5.1.124	Electricity grid mix 1kV-60kV (2040) (no improvements in sustainability policy)
	Thermal energy	Gabi database 10.5.1.124	Thermal energy from natural gas
	Russian natural gas grid	Gabi database 10.5.1.124	Natural gas mix (RU)
	PEM electrolyzer	Gabi database 10.5.1.124	Hydrogen (electrolysis, decentral - for partly aggregation, open input electricity)
	SMR	Gabi database 10.5.1.124	Hydrogen (steam reforming, centralised - for partly aggregation, open input natural gas)
	Electrictiy grid 2030 (FI)	Gabi database 10.5.1.124	Electricity grid mix (2030) (significant improvements in sustainability policy)
	District heating	Gabi database 10.5.1.124	District heating mix (EU-28)
	Hydrogen compression	Gabi database 10.5.1.124	Compression of hydrogen
	Compressed air	Gabi database 10.5.1.124	Compressed air 7 bar (medium power consumption)
	Electricity from wind energy	Gabi database 10.5.1.124	Electricity from wind power (FI)
	Water	Gabi database 10.5.1.124	Tap water from groundwater (EU-28)
	Deionisation	Gabi database 10.5.1.124	Deionised water (reverse-osmosis/electro-deionisation, from groundwater, for regionalization)
	Electricity from solar energy	Gabi database 10.5.1.124	Electricity from solar thermal (FI)
	Thermal energy from peat (avioded)	Gabi database 10.5.1.124	Thermal energy from peat
	Thermal energy from coal (avioded)	Gabi database 10.5.1.124	Thermal energy from coal
	Thermal energy from biomass (avioded)	Gabi database 10.5.1.124	Thermal energy from biomass
	Oxygen (avoided)	Gabi database 10.5.1.124	Oxygen (gaseous)

## Sheet: Electricity mix
	Table SM 7. Used electricity grid mixes.
	Renewable grid mix		Process
	Grid mix 1 (Saygin et. al. 2021)
	Wind	0.5	Gabi process name for XX
	Solar	0.5	Gabi process name for XX
	Grid mix 2 (Agrawal et al. 2019
	Wind	0.7	Gabi process name for XX
	Solar	0.3	Gabi process name for XX

## Sheet: Results 
	Results
	Table SM 8. LCIA results of hydrogen production.
		Grey		Blue		Turquoise		Green H2
		Pipeline	LNG	Pipeline	LNG	Pipeline	LNG	Wind	Solar
	Natural gas extraction	2.4	2.3	2.4	2.3	3.3	3	0	0
	Transmission	1.1	2.4	1.1	2.4	1.2	3.7	0	0
	Reactor	9	9	9	9	1.7	1.7	0	0
	Energy CCS	0	0	0.8	0.8	0	0	0	0
	Avoided district heat	-0.3	-0.3	-0.3	-0.3	-0.3	-0.3	0	0
	CCS	0	0	-5.4	-5.4	0	0	0	0
	Solar panel	0	0	0	0	0	0	0	2.4
	Wind turbine	0	0	0	0	0	0	0.5	0
	electrolyser	0	0	0	0	0	0	0.1	0.1
	Total	12.2	13.4	7.6	8.8	5.9	8.1	0.6	2.5
	Table SM 9. LCIA result of GWP100 and GWP20
		Grey Hydrogen		Blue hydrogen		Turquoise Hydrogen		Green Hydrogen
		GWP100	GWP20	GWP100	GWP20	GWP100	GWP20	GWP100	GWP20
	Pipeline	12.25	13.9	7.6	9.4	6.05	8.29	1.59	1.72
	LNG	14.01	16.5	9.25	11.7	8.3	11.49	0	0
	Table SM 10. LCIA result of grid and wind electricity
		Grey Hydrogen		Blue hydrogen		Turquoise Hydrogen
		Grid	Wind	Grid	Wind	Grid	Wind
	Pipeline	12.25	11.73	7.6	6.54	6.05	5.3
	LNG	14.01	11.94	9.25	6.6	8.3	5.62
	Table SM 11. LCIA result of 60% and 90% Carbon captured
		CCS 60%	CCS 90%
	Pipeline	7.6	5.06
	LNG	9.25	6.68
	Table SM 12. LCIA result of normal and double vent
		Grey hydrogen		Blue hydrogen		Turquoise hydrogen
		Normal	double vent	normal	double vent	normal	double vent
	Pipeline	12.3	13.3	7.6	8.62	6	7.45
	LNG	14	15.01	9.3	10.3	8.3	9.7
	Table SM 13. LCIA result of green hydrogen production
		Green hydrogen
		Wind	Solar	50-50% wind-solar
	Solar panel	0	2.4	1.2
	Wind turbine	0.5	0	0.3
	Electrolyzer	0.1	0.1	0.1
	Total	0.6	2.5	1.6
	Table SM 14. LCIA result of sensitivity analysis of green hydrogen value from literature
		Solar panel	Wind Turbine
	Results	2.5	0.6
	Average value from literature	2.3	2.4
	Maximum value from literature	4.5	2.8
	Table SM 15. LCIA result of sensitivity analysis of green hydrogen when heat is recovered
		Results	Heat recovery included (EU)	Heat recovery included (natural gas)	Heat recovery included (Biomass)	Heat recovery included (Hard coal)	Heat recovery included (Peat)
	100% wind	0.6	-1.4	-1.3	0.5	-2.9	-3.5
	100% solar	2.5	0.6	0.7	2.5	-0.9	-1.5
	50 - 50% wind and solar	1.6	-0.4	-0.3	1.5	-1.9	-2.5
	Table SM 16. LCIA result of sensitivity analysis of green hydrogen when oxygen utilisation is included
		Solar panel	Wind Turbine	50-50% wind and solar
	Results	2.5	0.6	1.6
	Oxygen utilisation included	1.75	-0.25	0.75

## Sheet: Carbon Black
	Table SM.17 Carbon black (solid carbon) market globally
	Parameter	Value	Unit
	Carbon black prize	1143	US / MT		https://www.chemanalyst.com/Pricing-data/carbon-black-42
	Carbon black market size	17.2	Billion US dollars		https://www-statista-com.ezproxy.cc.lut.fi/statistics/1350339/global-carbon-black-market-size/
		17200	Million us dollars
		17200000000	USD
		1.50481e+07	Tons
		15.0481	Mt
	Carbon black globally	15	Mt		https://www.chemanalyst.com/Pricing-data/carbon-black-42
	Table SM. 18 Natural gas needed to produce all carbon black
	Parameter	Value	Unit
	Demand	15.0481	million tons carbon black
	Solid carbon from TDM	3.25	kg/kgH2
	Natural gas needed for TDM	4.8039	kg/kgH2
	Hydrogen produced from TDM	1	hydrogen
		1.47812	kg NG / kg Carbon
		0.208164	kg H2 / kg natural gas
	Natural gas neeeded for global carbon production	22.243	million tonnes
		0.72	m3/kg		https://www.kaasuyhdistys.fi/julkaisut/maakaasun-kasikirja/
		2.2243e+10	kg
		3.0893e+10	m3
		30893	million m3
	Global Natural gas annual consumption	4089	billion m3		https://www-statista-com.ezproxy.cc.lut.fi/statistics/265344/total-global-natural-gas-production-since-1998/
		4089000	million m3
	Natural neeeded for cabon black from global consumption	0.00755515	NG from global consumption for global demand of black carbon
	Hydrogen produce while producing Global black carbon	4.63019	Mt Hydrogen / a
	Table SM 19. Global hydrogen production
	Parameter	Value	Unit
	Global hydrogen production	75	Mt/a	https://www.irena.org/Energy-Transition/Technology/Hydrogen
	Share by natural gas	0.47		https://www.irena.org/Energy-Transition/Technology/Hydrogen
		35.25	Mt / a
	Share of hydrogen produced by turquoise hydrogen (when fulfilling the carbon black demand)	0
